# Supplementary material
Source: publisher figshare collection journal article supplement (https://gsapubs.figshare.com/ndownloader/files/23236442)
Supplement: Supplementary file 1 [file 23236442]

Shobe, C.M., Bennett, G.L., Tucker, G.E., Roback, K., Miller, S.R., and Roering, J.J., 2020, Boulders as a lithologic control on river and landscape response to tectonic forcing at the Mendocino triple junction: GSA Bulletin, <https://doi.org/10.1130/B35385.1>.

## Supplemental Material

### Supporting information Table 1:

Table of boulder mapping locations (in the order in which they appear in Fig. 10):

| Name of image | Date of image from Google Earth | Latitude (°N)               | Longitude (°W)              |
|---------------|---------------------------------|-----------------------------|-----------------------------|
| kjf1          | 5/29/2014                       | 39.89374                    | -123.5326                   |
| kjf2          | 8/13/2017                       | 39.91843                    | -123.4708                   |
| kjf3_p1       | 5/27/2016                       | 40.63894                    | -123.7171                   |
| kjf3_p2       | Same image as row above         | Same earthflow as row above | Same earthflow as row above |
| kjf4          | 8/13/2017                       | 39.72247                    | -123.3627                   |
| kjf5_p1       | 8/13/2017                       | 40.05717                    | -123.4979                   |
| kjf5_p2       | Same image as row above         | Same earthflow as row above | Same earthflow as row above |
| kjf5_p3       | Same image as row above         | Same earthflow as row above | Same earthflow as row above |
| kjf5_p4       | Same image as row above         | Same earthflow as row above | Same earthflow as row above |
| kjf6          | 8/13/2017                       | 39.98449                    | -123.4554                   |
| nonkjf1       | 5/29/2014                       | 39.76365                    | -123.6426                   |
| nonkjf2       | 5/29/2014                       | 39.76734                    | -123.6481                   |
| nonkjf3       | 5/29/2014                       | 39.77406                    | -123.6461                   |
| nonkjf4       | 5/29/2014                       | 39.78307                    | -123.6447                   |
| nonkjf5       | 5/29/2014                       | 39.79619                    | -123.6473                   |
| nonkjf6       | 5/29/2014                       | 39.80738                    | -123.6536                   |
| nonkjf7       | 5/29/2014                       | 39.81051                    | -123.6498                   |
| nonkjf8       | 5/29/2014                       | 39.81644                    | -123.6510                   |
| nonkjf9       | 5/29/2014                       | 39.81918                    | -123.6505                   |
| nonkjf10      | 5/29/2014                       | 39.82045                    | -123.6515                   |
| kjfs1         | 5/31/2014                       | 39.61681                    | -122.8711                   |
| kjfs2         | 5/31/2014                       | 39.66756                    | -123.1522                   |
| kjfs3         | 5/31/2014                       | 39.66239                    | -123.1429                   |
| kjfs4         | 5/31/2014                       | 39.65838                    | -123.1346                   |
| kjfs5         | 5/29/2014                       | 40.86438                    | -123.7869                   |
| kjfs6         | 5/31/2014                       | 39.65811                    | -123.1364                   |
| kjfs7         | 5/31/2014                       | 39.67875                    | -123.0952                   |
| kjfs8         | 5/31/2014                       | 39.65876                    | -123.1372                   |
| kjfs9         | 5/31/2014                       | 39.68288                    | -123.1006                   |
| kjfs10        | 5/31/2014                       | 39.68163                    | -123.0996                   |
